# Supplementary material
Source: HighWire-hosted journal article supplement (https://jnm.snmjournals.org/highwire/filestream/94796/field_highwire_adjunct_files/0/151480_Supplemental_Data.pdf)
Supplement: 151480_Supplemental_Data.pdf [file 151480_Supplemental_Data.pdf]

**Supplemental Table 1. DVR and CBF associations in 55 nondemented older adults**

| Region (Brodmann Area)       | Side | Coordinates |     |     | T-value | Spatial extent (#voxels) |
|------------------------------|------|-------------|-----|-----|---------|--------------------------|
|                              |      | x           | y   | z   |         |                          |
| <b>WHOLE GROUP</b>           |      |             |     |     |         |                          |
| Superior frontal gyrus (8)   | L    | -20         | 48  | 44  | 5.25    | 175                      |
| Middle frontal gyrus (9)     | L    | -54         | 12  | 34  | 4.48    | 89                       |
| Postcentral gyrus (1)        | R    | 52          | -28 | 56  | 3.32    | 70                       |
| Postcentral gyrus (5)        | L    | -42         | -38 | 60  | 4.55    | 89                       |
| Paracentral lobule (4)       | B    | 0           | -28 | 64  | 11.16   | 4772                     |
| Superior parietal lobule (7) | R    | 36          | -66 | 50  | 4.34    | 52                       |
| Superior temporal gyrus (12) | L    | -54         | 12  | -8  | 5.39    | 361                      |
| Superior temporal gyrus (12) | R    | 54          | 10  | -8  | 4.94    | 117                      |
| Superior temporal gyrus (38) | R    | 30          | 18  | -26 | 3.38    | 62                       |
| Inferior temporal gyrus (20) | R    | 38          | -8  | -28 | 5.6     | 568                      |
| Uncus (38)                   | R    | 22          | 4   | -44 | 3.95    | 71                       |
| Uncus (20)                   | L    | -34         | -6  | -28 | 6       | 683                      |
| Cuneus (19)                  | R    | 2           | -92 | 28  | 4.67    | 608                      |
| Thalamus                     | B    | 0           | -10 | 2   | 7.83    | 467                      |
| Midbrain                     | R    | 10          | -14 | -28 | 5.19    | 99                       |
| Cerebellum                   | R    | 4           | -66 | -6  | 9.07    | 8595                     |
| Cerebellum                   | R    | 46          | -58 | -30 | 7.29    | 650                      |
| Cerebellum                   | L    | -50         | -52 | -44 | 6.1     | 830                      |

|                              |   |     |     |     |       |      |
|------------------------------|---|-----|-----|-----|-------|------|
| Cerebellum                   | L | -4  | -52 | -36 | 5.99  | 401  |
| Cerebellum                   | L | -38 | -80 | -34 | 5.17  | 59   |
| <b>UPPER TERTILE</b>         |   |     |     |     |       |      |
| Superior frontal gyrus (6)   | L | -24 | 16  | 64  | 7.04  | 95   |
| Superior frontal gyrus (10)  | L | -14 | 64  | 18  | 10.01 | 72   |
| Medial frontal gyrus (8)     | R | 2   | 28  | 38  | 10.49 | 255  |
| Medial frontal gyrus (9)     | R | 2   | 52  | 24  | 10.11 | 105  |
| Middle frontal gyrus (8)     | L | -30 | 34  | 38  | 11.5  | 188  |
| Middle frontal gyrus (9)     | L | -44 | 20  | 36  | 9.07  | 54   |
| Inferior frontal gyrus (45)  | R | 22  | 18  | 22  | 9.29  | 177  |
| Subcallosal gyrus (25)       | B | 0   | 14  | -14 | 7.01  | 118  |
| Orbitofrontal gyrus (11)     | L | -2  | 42  | -30 | 10.33 | 223  |
| Paracentral lobule (5)       | R | 4   | -42 | 68  | 16.61 | 1237 |
| Superior temporal gyrus (38) | R | 44  | 20  | -14 | 5.2   | 80   |
| Superior temporal gyrus (12) | R | 52  | 8   | -6  | 6.84  | 122  |
| Superior temporal gyrus (38) | L | -50 | 18  | -18 | 10.57 | 146  |
| Superior temporal gyrus (42) | R | 68  | -26 | 22  | 6.17  | 152  |
| Middle temporal gyrus (21)   | L | -72 | -16 | -14 | 6.49  | 57   |
| Fusiform gyrus (19)          | R | 44  | -42 | -12 | 7.79  | 55   |
| Insula                       | L | -44 | 0   | 4   | 6.81  | 62   |
| Middle occipital gyrus (19)  | L | -26 | -74 | 6   | 12.21 | 597  |
| Cuneus (18)                  | L | -2  | -76 | 14  | 6.63  | 110  |
| Cuneus (19)                  | L | -2  | -82 | 32  | 7.23  | 229  |

|                               |   |     |     |     |       |       |
|-------------------------------|---|-----|-----|-----|-------|-------|
| Cingulate gyrus (23)          | R | 22  | -26 | 34  | 13.13 | 433   |
| Caudate                       | L | -18 | 18  | 10  | 6.94  | 102   |
| Cerebellum                    | R | 48  | -56 | -36 | 5.46  | 81    |
| Cerebellum                    | R | 8   | -58 | -4  | 10.82 | 448   |
| <b>LOWER TERTILE</b>          |   |     |     |     |       |       |
| Superior frontal gyrus (6)    | L | -22 | 4   | 66  | 16.5  | 80    |
| Superior frontal gyrus (11)   | L | -30 | 64  | -12 | 10.06 | 559   |
| Superior frontal gyrus (11)   | R | 16  | 68  | -10 | 6.81  | 493   |
| Inferior frontal gyrus (44)   | R | 58  | 14  | 28  | 5.28  | 101   |
| Precentral gyrus (6)          | L | -62 | 4   | 8   | 12.4  | 2971  |
| Inferior parietal lobule (40) | R | 50  | -34 | 50  | 16.5  | 615   |
| Superior temporal gyrus (22)  | R | 52  | 6   | -6  | 17.51 | 1401  |
| Superior temporal gyrus (42)  | R | 66  | -28 | 18  | 7.82  | 317   |
| Middle temporal gyrus (21)    | R | 68  | -12 | -12 | 9.15  | 103   |
| Inferior temporal gyrus (20)  | R | 42  | -22 | -26 | 8.58  | 143   |
| Fusiform gyrus (37)           | R | 54  | -56 | -14 | 7.63  | 185   |
| Uncus (20)                    | R | 26  | -18 | -28 | 10.87 | 454   |
| Corpus callosum               | B | 0   | 30  | 10  | 20.24 | 19901 |
| Cerebellum                    | L | -38 | -80 | -30 | 12.56 | 187   |
| Cerebellum                    | L | -6  | -52 | -24 | 8.83  | 234   |
| Cerebellum                    | L | -40 | -48 | -38 | 8.64  | 629   |

**Supplemental Table 2. DVR and  $R_1$  associations in 55 nondemented older adults**

| Region (Brodmann area)       | Side | Coordinates |     |     | T-value | Spatial extent (#voxels) |
|------------------------------|------|-------------|-----|-----|---------|--------------------------|
|                              |      | x           | y   | z   |         |                          |
| <b>ENTIRE GROUP</b>          |      |             |     |     |         |                          |
| Superior frontal gyrus (10)  | R    | 30          | 64  | 18  | 3.77    | 64                       |
| Middle frontal gyrus (46)    | L    | -50         | 48  | 18  | 3.15    | 53                       |
| Inferior frontal gyrus (45)  | R    | 56          | 38  | 0   | 3.55    | 162                      |
| Superior parietal lobule (7) | L    | -32         | -52 | 48  | 3.17    | 68                       |
| Cerebellum                   | L    | -36         | -78 | -42 | 34.13   | 69482                    |
| Cerebellum                   | L    | -8          | 50  | -30 | 3.91    | 161                      |
| <b>UPPER TERTILE</b>         |      |             |     |     |         |                          |
| Orbital gyrus (11)           | L    | -8          | 50  | -30 | 13.67   | 455                      |
| Precentral gyrus (3)         | R    | 40          | -20 | 40  | 8.6     | 80                       |
| Middle temporal gyrus (37)   | L    | -62         | -60 | 6   | 3.25    | 54                       |
| Inferior temporal gyrus (20) | R    | 44          | -26 | -34 | 6.79    | 164                      |
| Inferior temporal gyrus (37) | R    | 62          | -58 | -6  | 8.72    | 90                       |
| Uncus (38)                   | L    | -24         | 8   | -34 | 32.99   | 60082                    |
| <b>LOWER TERTILE</b>         |      |             |     |     |         |                          |
| Medial frontal gyrus (8)     | R    | 2           | 44  | 40  | 47.72   | 132120                   |
| Putamen                      | R    | 24          | -4  | 10  | 3.68    | 88                       |
